# Supplementary material
Source: PubMed Central journal article supplement (PMC11027718)

**A**

Carcinoma-adjacent Stroma

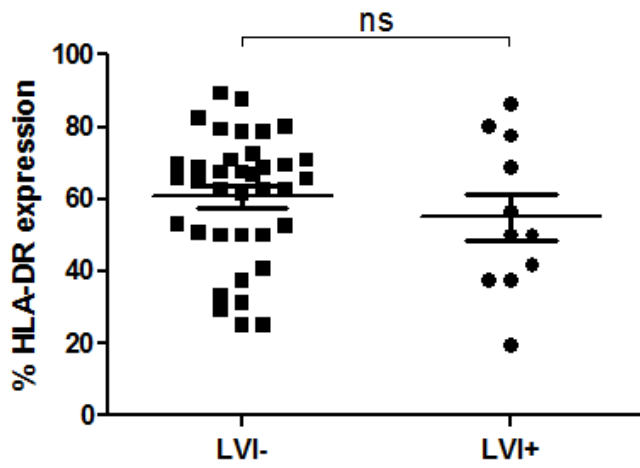**B**

Carcinoma-adjacent Epithelium

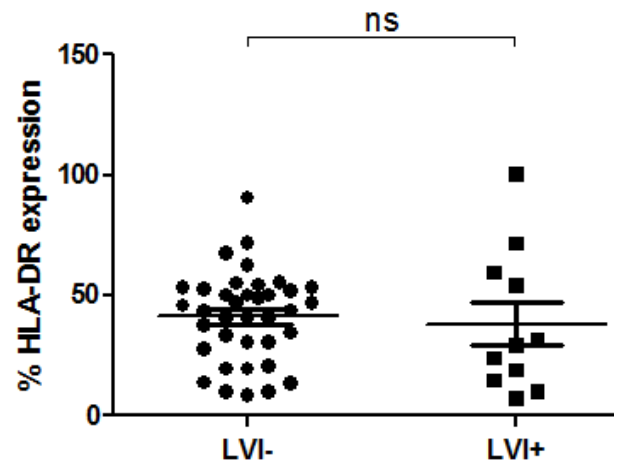**C**

Carcinoma Stroma

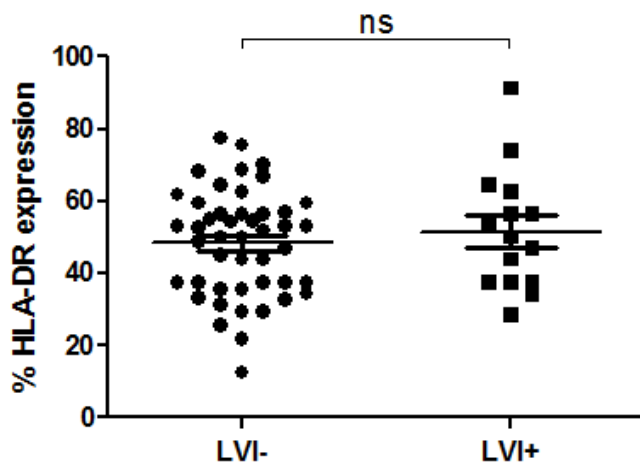**D**

Carcinoma Epithelium

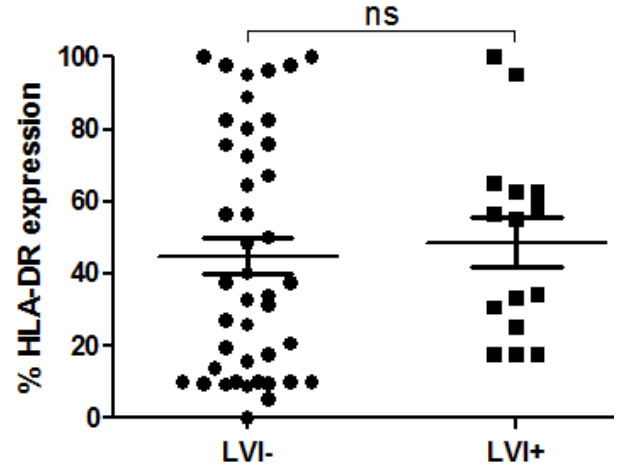

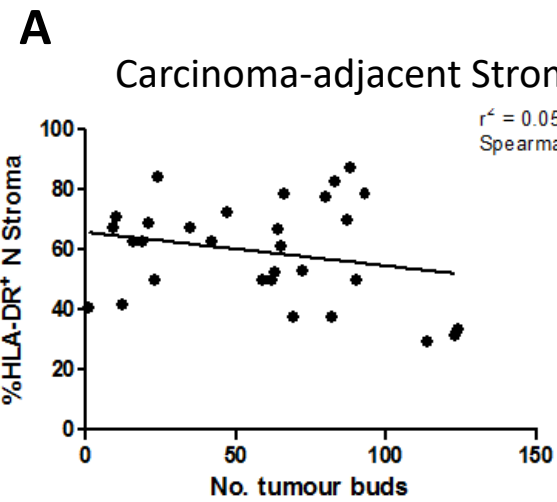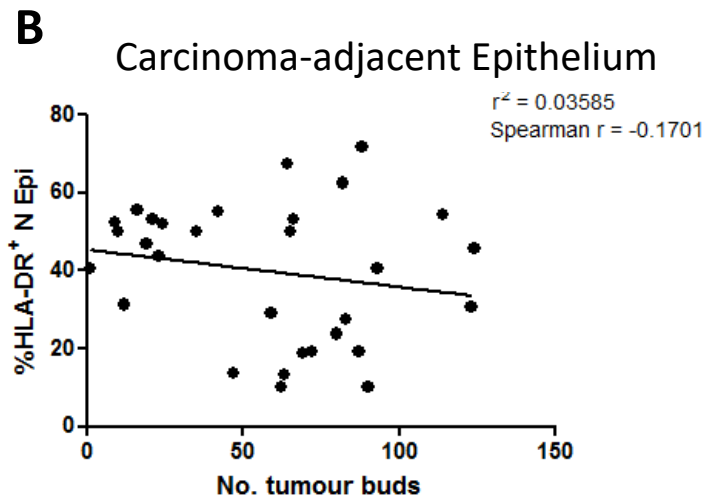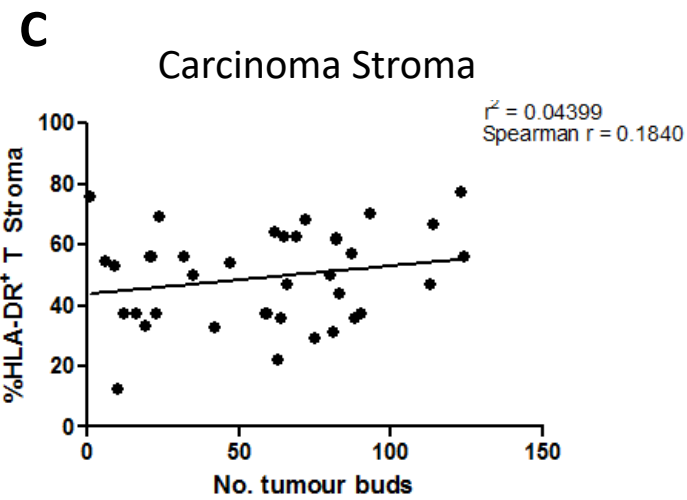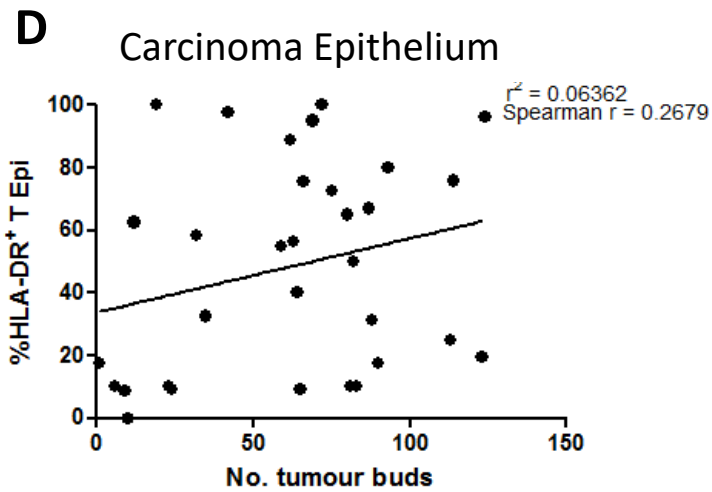

Supplement: 262_2020_2571_MOESM1_ESM.pdf [file 262_2020_2571_MOESM1_ESM.pdf]
